# Supplementary material for: Predictive and prognostic value of EPIC1 in patients with breast cancer receiving neoadjuvant chemotherapy
Source: PubMed Central journal article supplement — Ther Adv Med Oncol. 2020 Jul 24;12:1758835920940886. doi: 10.1177/1758835920940886 (PMC7383657; doi:10.1177/1758835920940886), 2020-07-24
Supplement: Supplementary_Materials_-_description.pdf [file Supplementary_Materials_-_description.pdf]

[Insert Supplementary Figure 1]

Supplementary Figure 1 The evolutionary conservation of EPIC1 by the University of California Santa Cruz (UCSC) Genome Browser
